# Supplementary material for: Competing climate feedbacks of ice sheet freshwater discharge in a warming world
Source: PubMed Central journal article supplement (PMC11189430; doi:10.1038/s41467-024-49604-3), 2024-06-18
Supplement: 41467_2024_49604_MOESM3_ESM.pdf [file 41467_2024_49604_MOESM3_ESM.pdf]

## **Description of Additional Supplementary Files**

**Supplementary Movie 1:** Animation of maps for selected variables in a moderate warming scenario (historical-SSP2-4.5 with an Equilibrium Climate Sensitivity of 4.0 °C), simulated by the coupled model with interactive ice sheet freshwater flux from both ice sheets.

**Supplementary Movie 2:** Animation of maps for selected variables in an intensive warming scenario (historical-SSP5-8.5 with an Equilibrium Climate Sensitivity of 5.6 °C), simulated by the coupled model with interactive ice sheet freshwater flux from both ice sheets.

**Supplementary Movie 3:** Animation of vertical cross-sections for selected variables in an intensive warming scenario (historical-SSP5-8.5 with an Equilibrium Climate Sensitivity of 5.6 °C), simulated by the coupled model with interactive ice sheet freshwater flux from both ice sheets.
